# Supplementary material
Source: Springer Nature journal article supplement (http://springerprofessional.de/resource/supplementary/40702_2024_1052_MOESM3_ESM.pdf/26806328)
Supplement: MOESM3 [file 26806328]

**Deskriptive Statistiken**

|                                              | Beispiel | N | Minimum | Maximum | Mittelwert | Std.-Abweichung |
|----------------------------------------------|----------|---|---------|---------|------------|-----------------|
| <b>Komplexität</b><br>(1) Hoch / (6) Niedrig | 1        | 8 | 2       | 6       | 4.88       | 1.36            |
|                                              | 2        | 8 | 1       | 6       | 3.50       | 1.85            |
|                                              | 3        | 8 | 1       | 6       | 3.25       | 2.05            |
|                                              | 4        | 8 | 2       | 6       | 4.25       | 1.49            |
|                                              | 5        | 8 | 1       | 6       | 3.88       | 2.17            |
|                                              | 6        | 8 | 1       | 6       | 3.38       | 1.77            |
|                                              | 7        | 8 | 1       | 6       | 4.63       | 1.77            |
|                                              | 8        | 8 | 2       | 6       | 4.75       | 1.39            |
|                                              | 9        | 8 | 3       | 6       | 5.00       | 1.07            |
|                                              | 10       | 8 | 1       | 5       | 2.50       | 1.31            |
|                                              | 11       | 8 | 1       | 6       | 3.38       | 1.92            |
|                                              | 12       | 8 | 1       | 6       | 3.63       | 1.92            |
|                                              | 13       | 8 | 3       | 6       | 4.88       | 1.36            |
|                                              | 14       | 8 | 3       | 6       | 5.25       | 1.16            |
|                                              | 15       | 8 | 1       | 6       | 3.38       | 2.00            |
|                                              | 16       | 8 | 2       | 6       | 4.00       | 1.31            |
|                                              | 17       | 8 | 1       | 6       | 4.25       | 1.67            |
| <b>Zeitaufwand</b><br>(1) Hoch / (6) Niedrig | 1        | 8 | 2       | 6       | 3.13       | 1.48            |
|                                              | 2        | 8 | 1       | 6       | 3.88       | 1.89            |
|                                              | 3        | 8 | 2       | 6       | 3.63       | 1.51            |
|                                              | 4        | 8 | 2       | 6       | 3.75       | 1.49            |
|                                              | 5        | 8 | 1       | 6       | 3.50       | 1.85            |
|                                              | 6        | 8 | 1       | 5       | 3.13       | 1.55            |
|                                              | 7        | 8 | 1       | 6       | 4.38       | 1.77            |
|                                              | 8        | 8 | 1       | 6       | 4.75       | 1.75            |
|                                              | 9        | 8 | 4       | 6       | 5.50       | 0.76            |
|                                              | 10       | 8 | 1       | 6       | 2.75       | 1.75            |
|                                              | 11       | 8 | 1       | 6       | 3.38       | 1.6             |
|                                              | 12       | 8 | 1       | 5       | 3.13       | 1.46            |
|                                              | 13       | 8 | 3       | 6       | 4.38       | 1.51            |
|                                              | 14       | 8 | 2       | 6       | 4.50       | 1.41            |
|                                              | 15       | 8 | 1       | 6       | 3.00       | 1.77            |
|                                              | 16       | 8 | 3       | 6       | 4.00       | 1.31            |
|                                              | 17       | 8 | 1       | 6       | 4.00       | 1.69            |
